# Supplementary material for: Tracking synthesis and turnover of triacylglycerol in leaves
Source: PubMed Central journal article supplement (PMC4339603; doi:10.1093/jxb/eru500), 2015-01-21
Supplement: supp_eru500_jexbot138016_file001.pdf [file supp_eru500_jexbot138016_file001.pdf]

## Supplemental figure 1

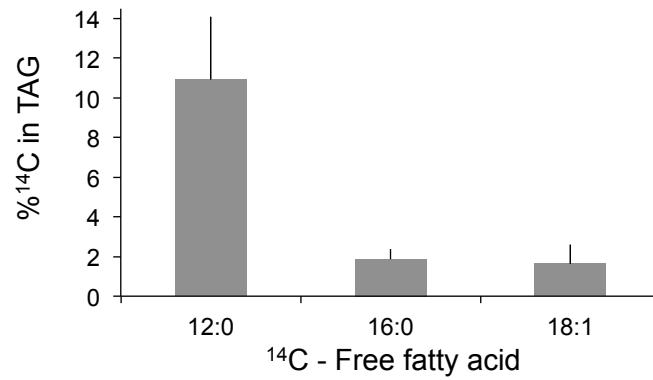

**Supplemental figure 1. Relative incorporation of <sup>14</sup>C-fatty acids into triacylglycerols in WT.** Equal amounts of <sup>14</sup>C labeled 12:0, 16:0 or 18:1 were added to leaves and incubated for 60 min prior to lipid extraction and TLC. Data points represent average  $\pm$  SD from 3 biological replicates.

## Supplemental figure 2

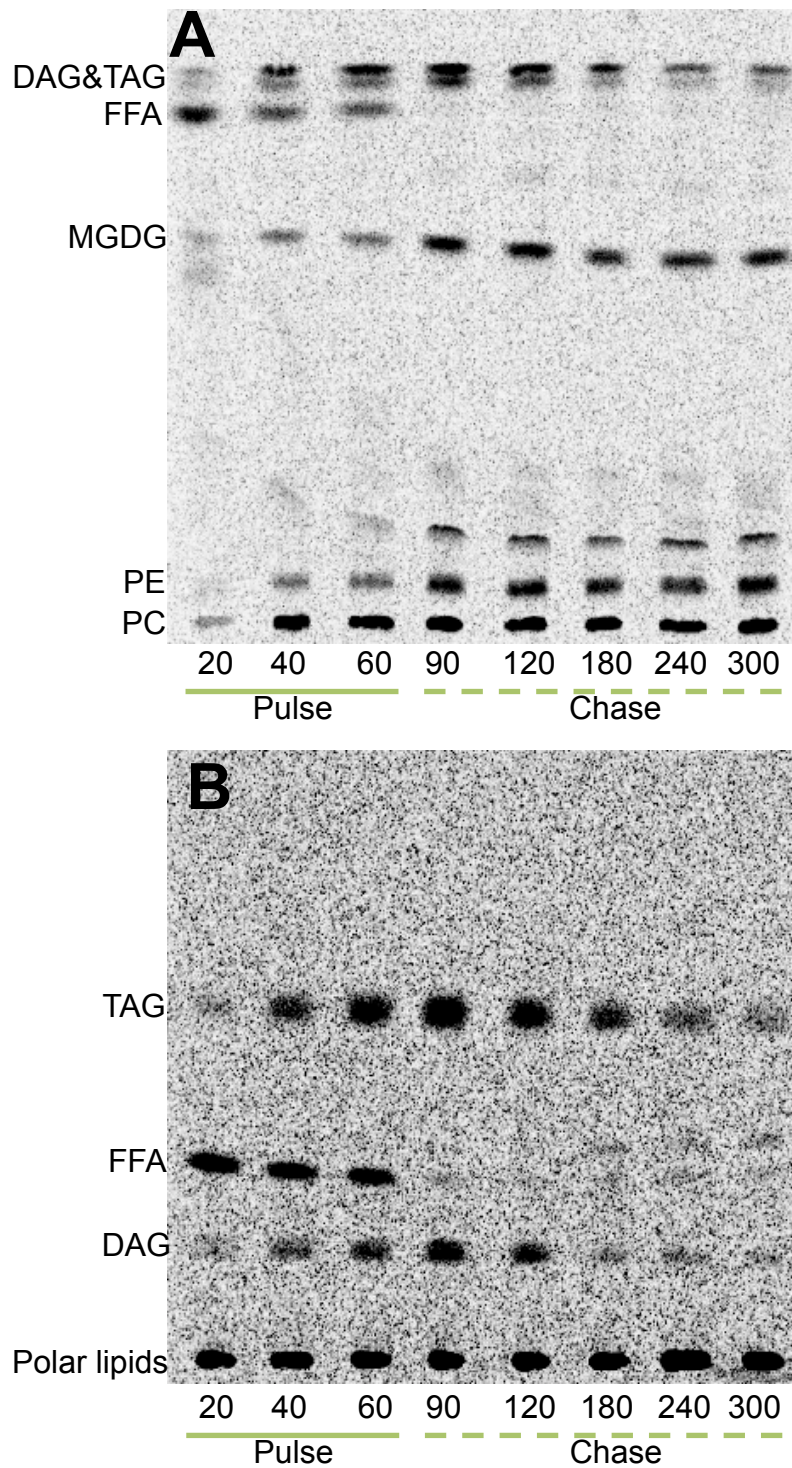

### Supplemental figure 2: Representative autoradiograms of TLC plates of $^{14}\text{C}$ -12:0 labeled lipids isolated from WT leaves

Lipids equivalent to  $3\mu\text{g}$  chlorophyll loaded in each lane. A, polar TLC developed with acetone:toluene:water (91:30:8). B, Neutral TLC developed hexane:diethylether:acetic acid (70:30:1) DAG: Diacylglycerol; FFA: Free fatty acid PC:Phosphatidylcholine; PE:Phosphoethanolamine (PE); MGDG: Monogalactosyldiacylglycerol and Triacylglycerol (TAG).

## Supplemental figure 3

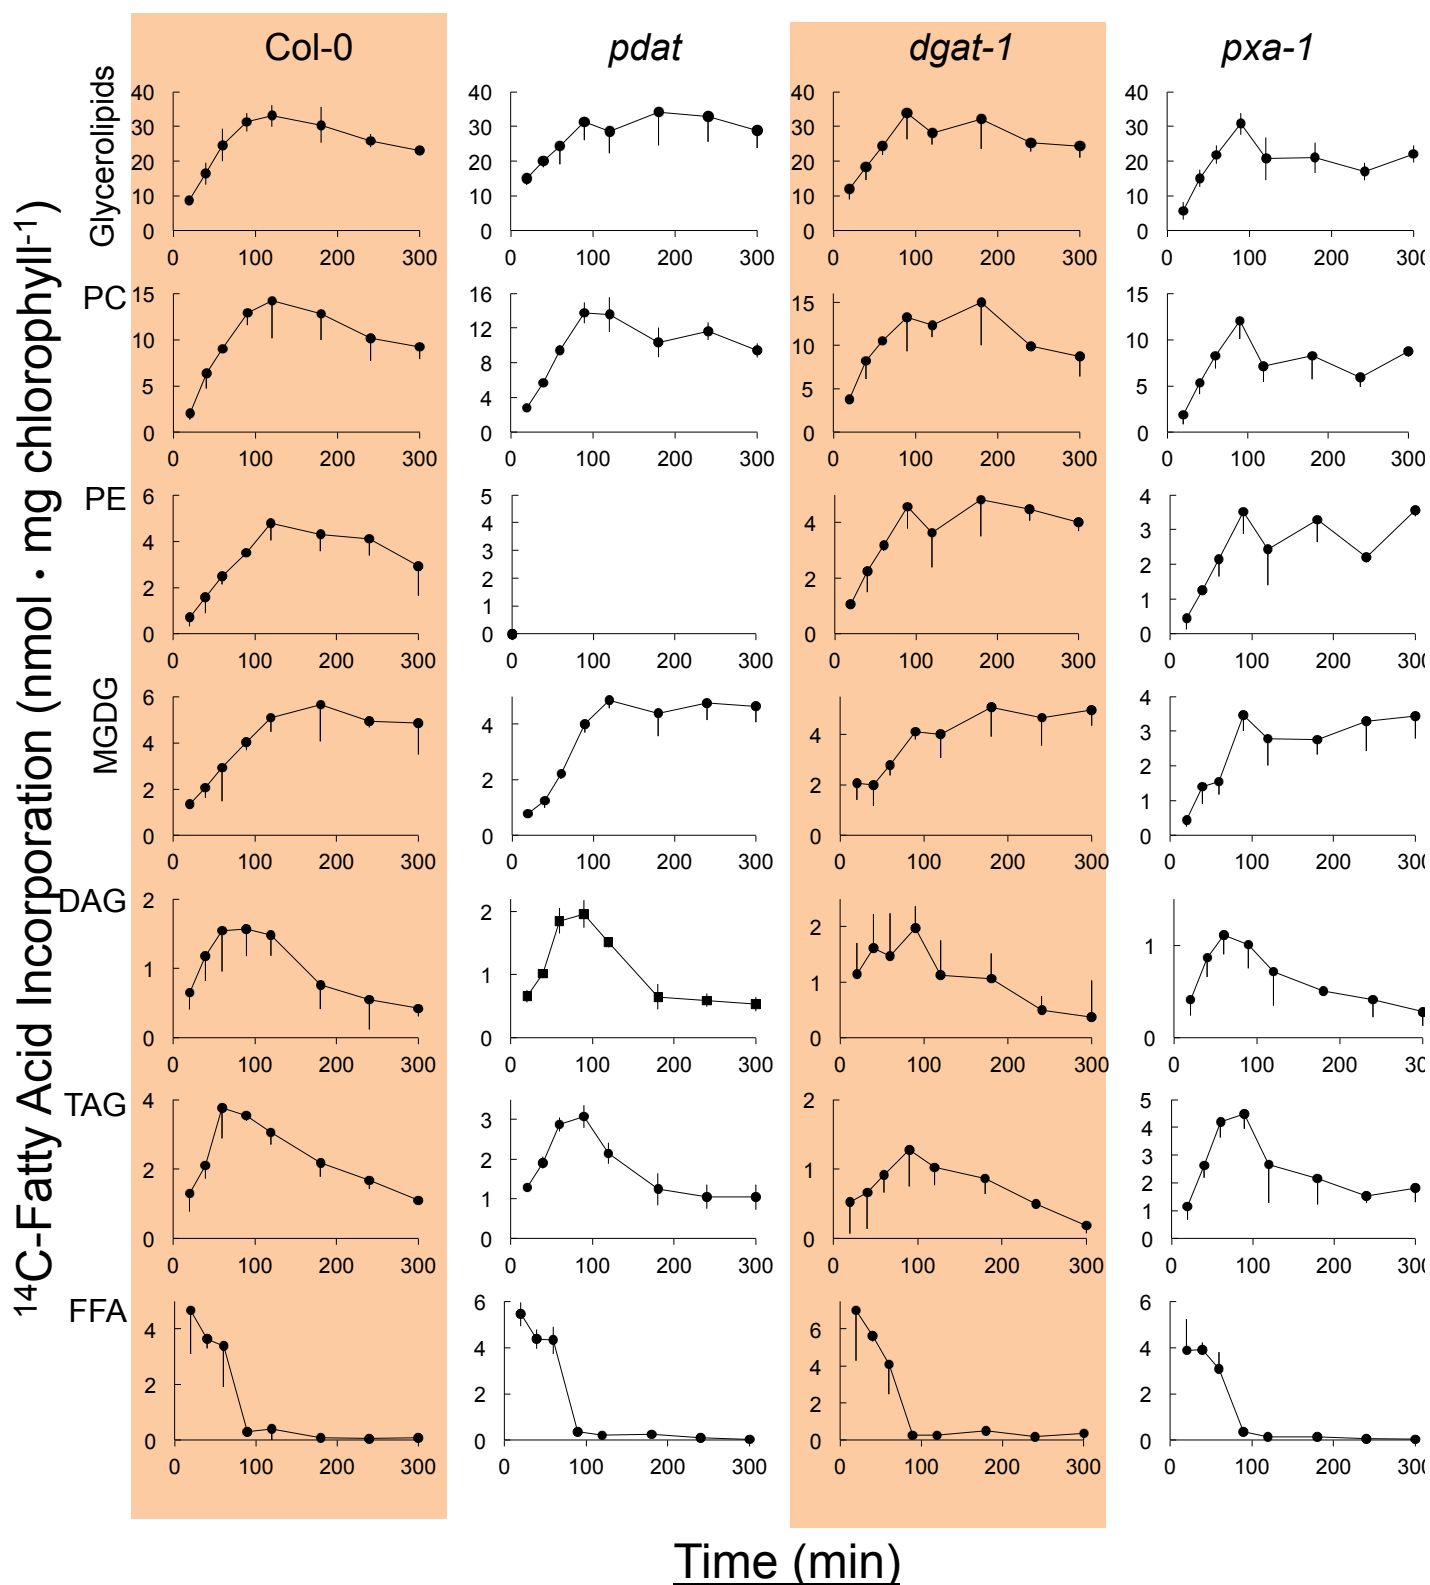

**Supplemental figure 3: Side by side comparison of <sup>14</sup>C abundance in lipids in WT, *pdat*, *dgat1* and *pxa-1***  
 DAG: Diacylglycerol; FFA: Free fatty acid PC: Phosphatidylcholine; PE: Phosphatidylethanolamine; MGDG: Monogalactosyldiacylglycerol and Triacylglycerol (TAG). Data represent average ± SD from 3 biological replicates

## Supplemental figure 4

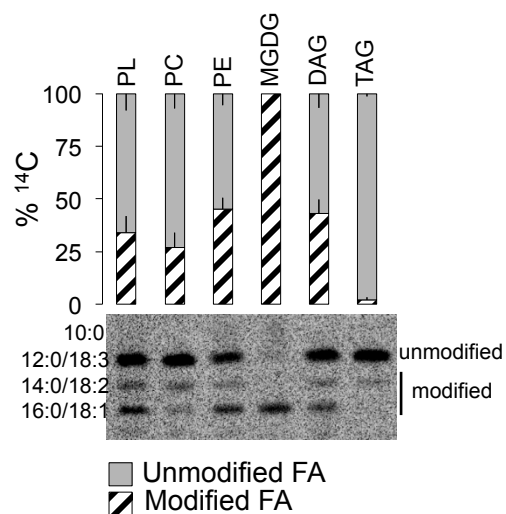

### Supplemental figure 4. Membrane lipids but not TAG contain plastid modified <sup>14</sup>C-fatty acid

Histogram presents the proportions of radioactivity in fatty acids (analyzed as FAMES) after 60 min of <sup>14</sup>C-lauric acid pulse labeling. Autoradiogram presents a representative reverse phase TLC plate (10000 DPM loaded in each lane). Polar lipids (PL); Phosphatidylcholine (PC); Phosphoethanolamine (PE); Monogalactosyldiacylglycerol (MGDG); Diacylglycerol (DAG); Triacylglycerol (TAG).

## Supplemental figure 5

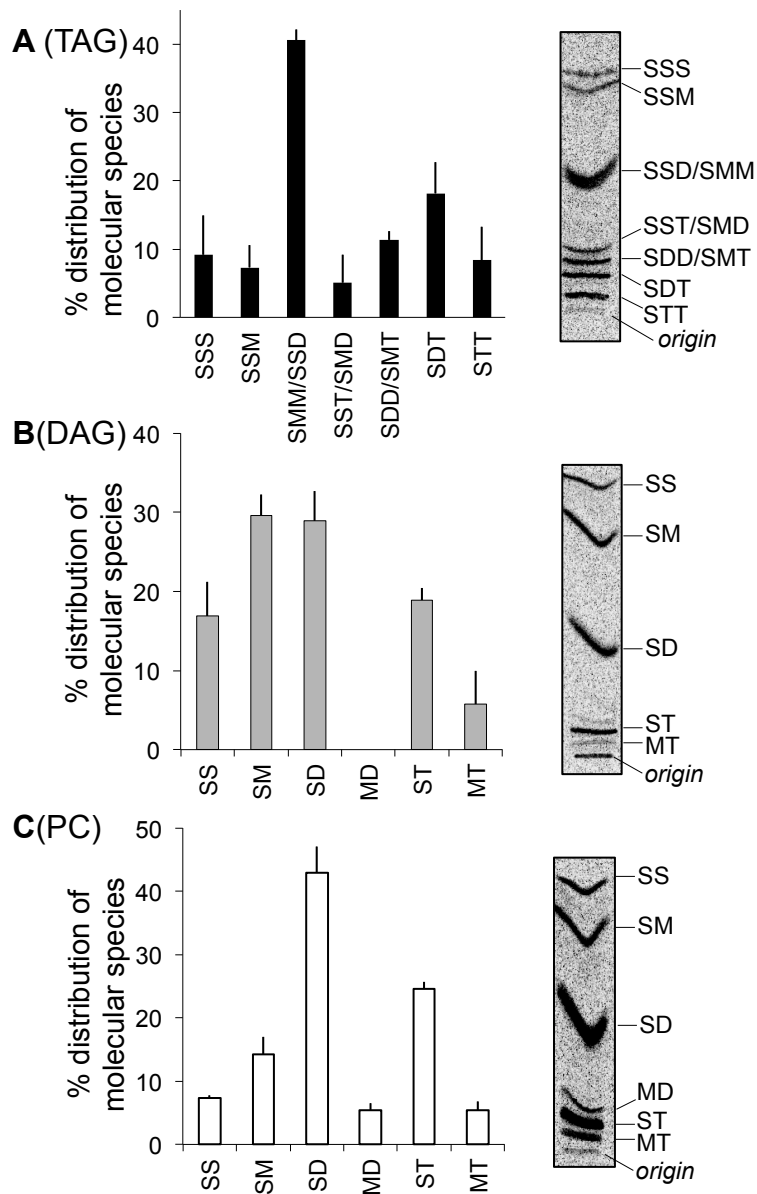

**Supplemental figure 5. Molecular species of  $^{14}\text{C}$ -labeled TAG, DAG and PC after 60 min of  $^{14}\text{C}$ -12:0 labeling of WT leaves**

Saturated FA (S); Mono-unsaturated FA (M); Di-unsaturated FA (D) and Tri-unsaturated FA (T). Data represent average  $\pm$  SD of 3 biological replicates. No regiochemistry is specified

**Supplemental table I:** <sup>14</sup>C-fatty acid composition of triacylglycerol (TAG), diacylglycerol (DAG) and phosphatidylcholine (PC). Data represent % <sup>14</sup>C distribution within each lipid  $\pm$  SD of three biological replicates.

| Fatty acid | TAG            | DAG            | PC             |
|------------|----------------|----------------|----------------|
| 12:0       | 98.1 $\pm$ 1.3 | 57.1 $\pm$ 6.9 | 63.5 $\pm$ 1.3 |
| 14:0       | 1.4 $\pm$ 1.2  | 13.2 $\pm$ 3.3 | 9.6 $\pm$ 2.1  |
| 16:0       | 0.5 $\pm$ 0.5  | 23.5 $\pm$ 4.5 | -0.9 $\pm$ 1.5 |
| 18:1       | <i>nd</i>      | 6.2 $\pm$ 0.2  | 18.6 $\pm$ 1.2 |
| 18:2       | <i>nd</i>      | <i>nd</i>      | 6.2 $\pm$ 2.1  |
| 18:3       | <i>nd</i>      | <i>nd</i>      | 3.0 $\pm$ 0.7  |

*nd= not detected*
